# Supplementary material
Source: publisher figshare collection journal article supplement (https://diabetesjournals.figshare.com/ndownloader/files/33660494)

## Electronic Supplemental Material

This appendix has been provided by the authors to give readers additional information about their work.

Supplement to: Parviainen A, Härkönen T, Ilonen J, But A, Knip M, and the Finnish Pediatric Diabetes Register. Heterogeneity of Type 1 Diabetes at Diagnosis Supports Existence of Age-related Endotypes. *Diabetes Care*

-Investigators of the Finnish Pediatric Diabetes Register

The Finnish Pediatric Diabetes Register comprises the following investigators:

**Principal Investigator:** Mikael Knip (Children's Hospital, Helsinki University Hospital)

**Steering Committee:** Per-Henrik Groop (Folkhälsan Research Center), Jorma Ilonen (Immunogenetics Laboratory, University of Turku), Timo Otonkoski (Children's Hospital, Helsinki University Hospital), Riitta Veijola (Department of Pediatrics, Oulu University Hospital).

**Locally responsible investigators:**

Alar Abram (Department of Pediatrics, Kanta-Häme Central Hospital), Henrikka Aito (Department of Pediatrics, HUS Porvoo Hospital), Ivan Arkhipov (Department of Pediatrics, Mehiläinen Länsi-Pohja Central Hospital), Elina Blanco-Sequeiros (Department of Pediatrics, Central Ostrobothnia Central Hospital), Jonas Bondestam (Department of Pediatrics, HUS Lohja Hospital), Markus Granholm (Department of Pediatrics, Jakobstad Hospital), Maarit Haapalehto-Ikonen (Department of Pediatrics, Rauma Hospital), Torsten Horn (Department of Pediatrics, Central Hospital of Central Finland), Hanna Huopio (Department of Pediatrics, Kuopio University Hospital), Joakim Janer (Department of Pediatrics, HUS Raasepori Hospital), Christian Johansson (Department of Pediatrics, Åland Central Hospital), Liisa Kalliokoski (Department of Pediatrics, Kainuu Central Hospital), Päivi Keskinen (Department of Pediatrics, Tampere University Hospital), Anne Kinnala (Department of Pediatrics, Turku University Central Hospital), Maarit Korteniemi (Department of Pediatrics, Central Hospital of Lapland), Hanne Laakkonen (Department of Pediatrics, HUS Hyvinkää Hospital), Jyrki Lähde (Department of Pediatrics, Satakunta Central Hospital), Päivi Miettinen (HUS New Children's Hospital), Päivi Nykänen (Department of Pediatrics, Mikkeli Central Hospital), Erik Popov (Department of Pediatrics, Vaasa Central Hospital), Mari Pulkkinen (Department of Pediatrics, HUS Jorvi Hospital),

Maria Salonen (Department of Pediatrics, Kymenlaakso Central Hospital), Pia Salonen (Department of Pediatrics, Päijät-Häme Central Hospital), Juhani Sankala (Department of Pediatrics, Savonlinna Central Hospital), Virpi Sidoroff (Department of Pediatrics, North Karelia Central Hospital), Anne-Maarit Suomi (Department of Pediatrics, South Ostrobothnia Central Hospital), Tuula Tiainen (Department of Pediatrics, South Karelia Central Hospital), Riitta Veijola (Department of Pediatrics, Oulu University Hospital)

**Supplementary Figure S1** – The distribution of HLA-DR/DQ genotype-based risk groups by age at diagnosis. Overall significance  $P < 0.001$  (Kruskal-Wallis test). Pairwise comparisons (Mann-Whitney U-test):  $P < 0.001$  for both the youngest age group vs. the oldest one, and the youngest age group vs. the middle age group.

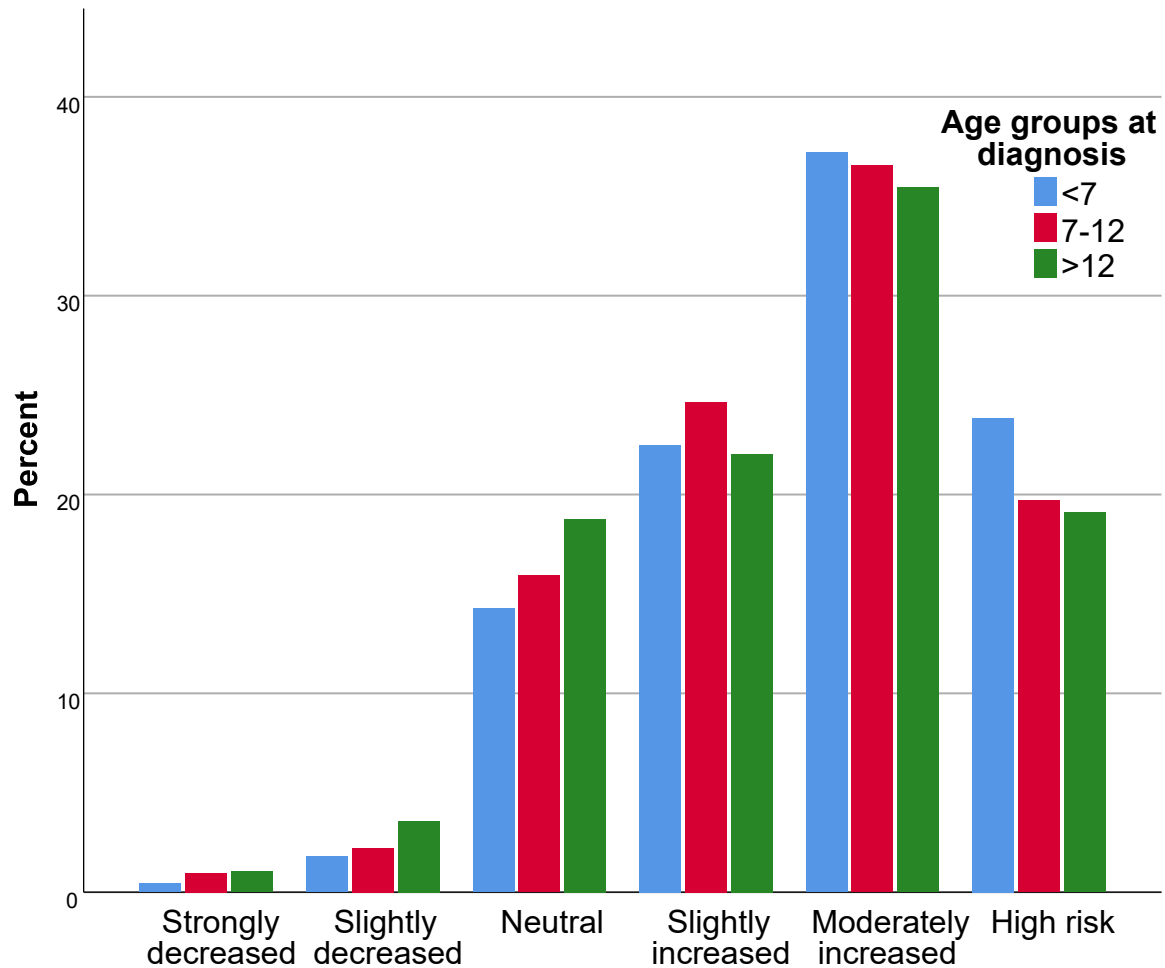

**Supplementary Figure S2** – The likelihood of having IAA positivity and familial type 1 diabetes rather than having IAA negativity and non-familial type 1 diabetes in relation to age at diagnosis estimated using binary logistic regression analysis with the restricted cubic spline function of age as the explanatory variable ( $P < 0.001$  for non-linearity,  $P < 0.001$  for the overall association). The grey area corresponds to the 95% confidence band, and the two vertical dashed lines are set to 7 and 13 years, to demonstrate the division into the three age groups used in the main analyses.

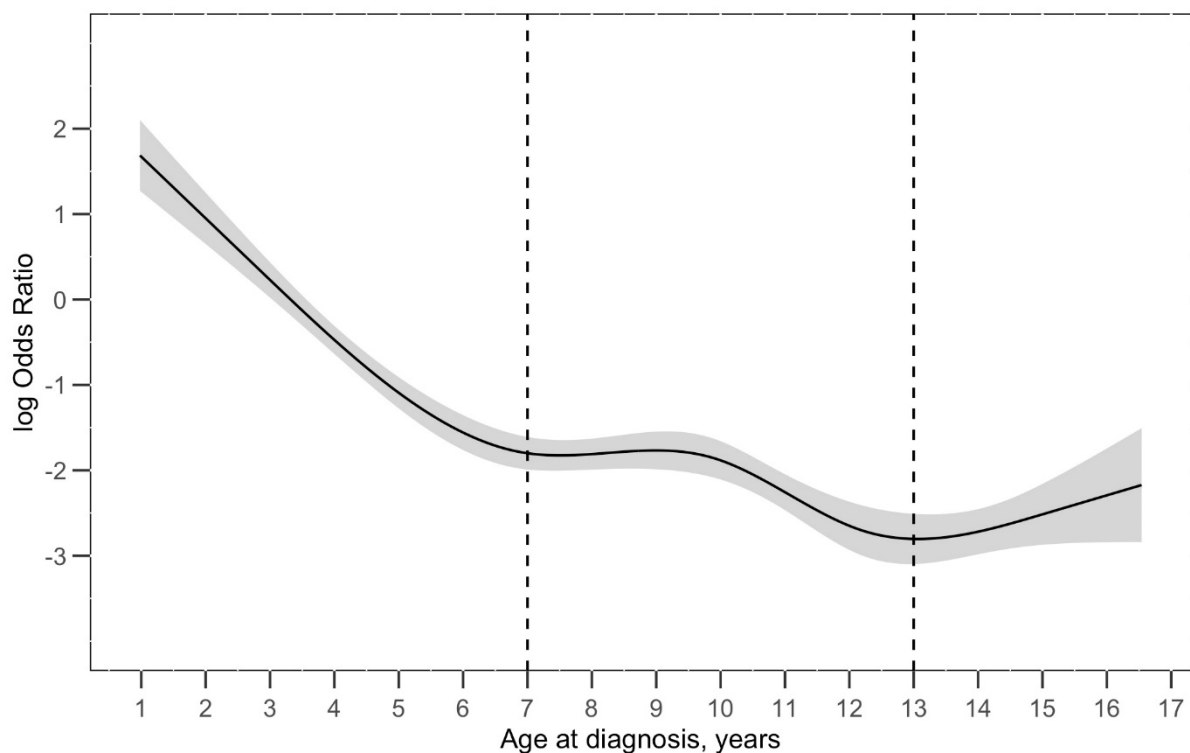

**Supplementary Figure S3** – The likelihood of having IAA positivity and non-familial type 1 diabetes rather than having IAA negativity and non-familial type 1 diabetes in relation to age at diagnosis estimated using binary logistic regression analysis with the restricted cubic spline function of age as the explanatory variable ( $P < 0.001$  for non-linearity,  $P < 0.001$  for the overall association). The grey area corresponds to the 95% confidence band, and the two vertical dashed lines are set to 7 and 13 years, to demonstrate the division into the three age groups used in the main analyses.

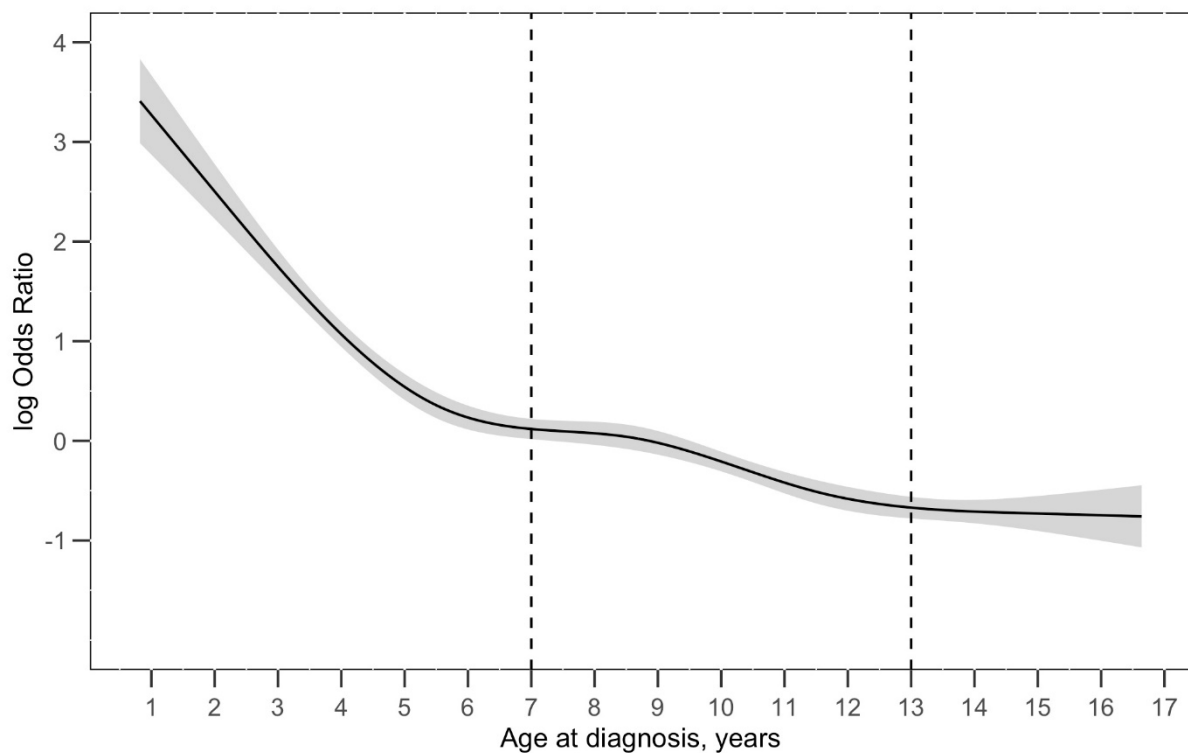

**Supplementary Figure S4** – The likelihood of having IAA negativity and familial type 1 diabetes rather than having IAA negativity and non-familial type 1 diabetes in relation to age at diagnosis. The likelihood was estimated using binary logistic regression analysis with the restricted cubic spline function of age as the explanatory variable [ $P = 0.529$  for non-linearity,  $P = 0.002$  for the linear association with a negative slope (OR=0.93, 95% CI 0.92-0.98)]. The grey area corresponds to the 95% confidence band, and the two vertical dashed lines are set to 7 and 13 years, to demonstrate the division into the three age groups used in the main analyses.

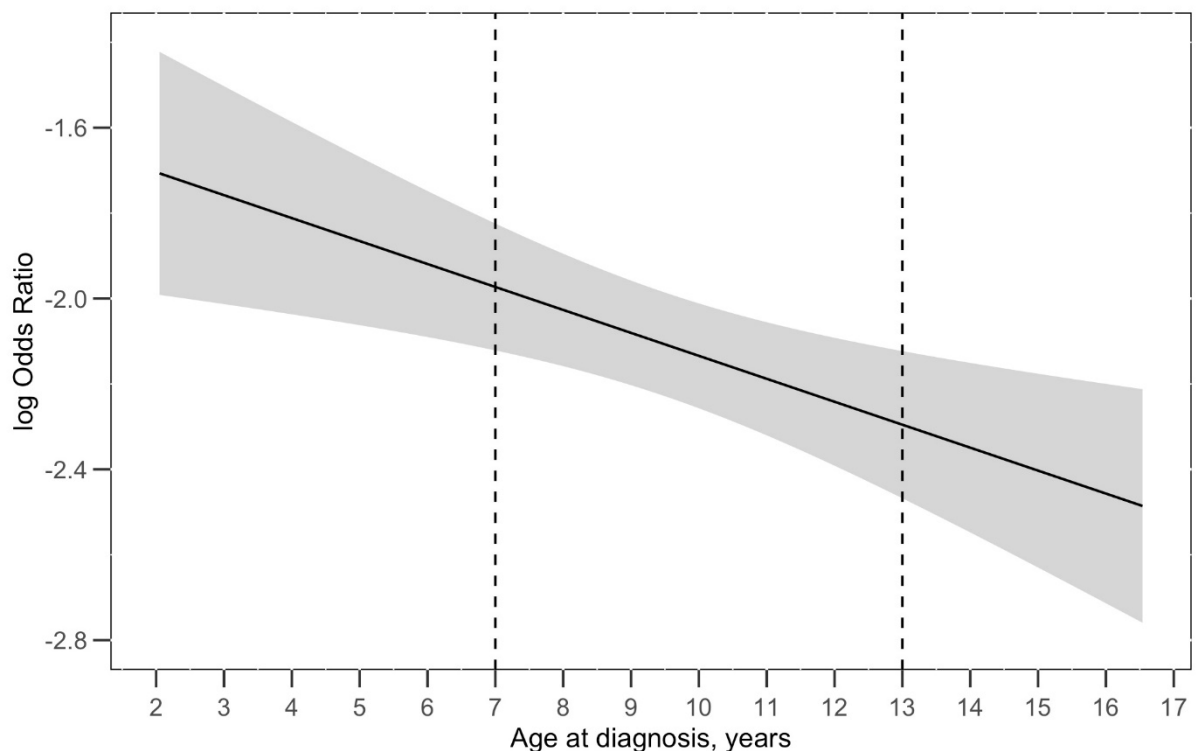

Supplement: Supplementary file 1 [file 33660494]
